# Supplementary material for: The Effects of Roxadustat on Thyroid Hormone Levels in Chinese Patients Undergoing Maintenance Hemodialysis
Source: Research Square preprint supplement (doi:10.21203/rs.3.rs-8294615/v1), 2026-01-21
Supplement: Supplementary file 1 [file a7e5df46a2d2f513b99688ba.xlsx]

## Sheet: Untitled3
Age (years)	Sex (1=female,2= male)	Vintage (months)	Hypertention (0=No,1=Yes)	Cardiovascular diseases (0=No, 1=Yes)	Cerebrovascular diseases (0=No, 1=Yes)	Malignancy (0=No,1=Yes)	Beta-blockers (0=No,1=Yes)	RAAS inhibitor (0=No,1=Yes)	Diabetes (0=No, 1= Yes)	Free triiodothyronine (pg/mL)	Free thyroxine (ng/mL)	Thyroid stimulating hormone (uIU/mL)	Parathyroid hormone (pg/mL)	Hemoglobin (g/L)	Creatinine (umol/L)	Uric acid (umol/L)	Albumin (g/L)	Total cholesterol (mmmol/L)	Alkaline phosphatase (U/L)	High-density lipoprotein cholesterol (mmmol/L)	Low-density lipoprotein cholesterol (mmmol/L)	High-sensitivity C-reactive protein (mg/L)	Creatine kinase (U/L)	Creatine kinase isoenzyme MB (ug/L)	Troponin T (pg/mL)	N-terminal pro-brain natriuretic peptide (pg/mL)	β-collagen sequence	procollagen type I N-terminal propeptide
60	2	13	1	0	0	0	1	1	1	2.61	1.48	0.883	43.8	141	372	317	37	5.67	61	1.1	3.67	0.2	64	1.44	15.4	467	0.777	106.2
55	2	111	1	0	0	0	1	0	0	2.39	1.05	0.943	262	108	1264	532	37	2.95	89	0.77	1.73	1.4	156	2.04	33.7	2944	6	355.6
26	1	4	1	0	0	0	1	1	1	1.94	1.02	1.013	67.1	88	633	326	32	2.96	53	0.48	1.49	0.2	39	0.82	19.7	4356	1.039	292
75	2	7	1	0	1	0	0	0	1	1.82	1.31	1.08	30.9	98	815	345	36	4.11	49	0.64	2.25	2.9	71	1.37	41.3	2264	0.851	334.2
79	2	4	1	1	0	0	1	1	1	1.82	1.05	1.104	136	107	569	470	39	2.44	49	0.6	1.23	6.2	109	3.31	87.7	1338	0.568	115.8
51	1	218	1	0	0	0	1	0	0	1.82	0.96	1.219	251	111	1086	599	37	2.64	119	0.82	1.2	6.5	124	2.26	35.1	1208	6	499.5
67	2	15	1	1	0	0	0	1	1	1.98	1.06	1.361	82.1	119	1051	368	35	3.49	109	0.72	1.68	0.6	90	2.18	47.3	576	1.136	451.4
58	1	10	1	0	0	0	0	0	0	1.98	1.05	1.375	154	120	640	293	37	1.76	81	0.92	0.54	1.4	57	0.86	27	1025	2.029	145
68	2	57	1	1	0	1	0	0	0	2.15	1.24	1.376	265	84	676	381	34	2.2	139	1.09	0.88	3.9	101	2.37	52	35000	1.838	560.5
42	2	51	0	0	0	0	1	1	1	1.87	0.94	1.485	434	88	1131	426	36	2.25	85	0.55	1.22	3.3	71	2.02	56.5	24522	1.99	292.2
51	2	3	1	0	0	0	1	0	0	2.37	0.95	1.606	153	116	856	545	37	2.51	89	1.08	1.06	1.4	92	1.23	39.8	2513	1.455	320.4
46	2	8	1	0	0	0	1	1	1	2.16	1.11	2.031	150	103	773	340	35	2.37	61	0.37	1.26	2.4	102	3.27	70.6	14762	1.58	320.5
65	1	3	1	0	0	0	0	0	0	1.87	0.97	2.348	64.1	124	880	304	37	3.11	60	0.97	1.69	3.6	41	0.82	32.8	3398	0.14	419.5
71	2	28	1	1	0	0	1	0	1	2.01	1	2.38	127	96	738	457	34	2.59	88	1.08	1.19	0.8	94	1.74	51.3	34958	1.598	442.6
72	1	158	1	1	1	1	1	0	0	3.94	1.34	3.43	33	92	322	260	30	3.84	148	1.4	1.94	4.3	16	1.7	37.2	309.5	1.837	494.5
50	1	96	1	1	0	0	1	0	1	1.93	0.97	5.104	744	108	949	376	34	2.08	92	0.6	1.02	2.2	64	2.58	104	8162	0.602	336
61	2	77	1	1	0	0	1	1	1	2.51	0.97	4.79	255	104	843	321	40	1.68	74	0.52	0.85	1	189	3.95	105	35000	2.493	316.1
60	2	90	1	0	0	0	1	0	0	2.26	1.24	0.752	299	127	1288	404	37	3.42	101	0.91	1.95	0.7	108	1.51	27.5	2345	2.368	299
61	2	83	1	0	0	0	1	1	0	2.45	1.63	0.784	137	109	541	372	37	3.84	66	0.82	2.49	1	63	1.35	21.2	8705	0.959	200.4
68	2	76	1	1	1	0	0	1	0	2.23	1.15	1.005	356	106	913	440	39	2.6	115	0.72	1.28	10.8	39	1.13	41.3	35000	3.736	353.2
58	1	167	1	0	0	0	1	1	0	2.04	1.45	1.021	97.2	115	1068	516	39	4.16	69	1.16	2.62	14.4	50	1.37	33	4109	3.196	394.7
46	2	5	1	0	0	0	0	0	1	2.31	1.02	1.089	234	92	628	645	45	6.21	132	0.63	1.12	2	276	8.97	125	687	0.684	230.4
66	1	181	1	1	0	0	1	0	0	1.87	1	1.137	118	106	698	315	35	3.65	128	1.12	2.14	1	109	1.93	60.1	21140	0.167	17.83
82	1	49	1	1	0	0	0	0	0	2.09	1.34	1.145	979	115	825	415	36	3.16	60	0.9	1.73	13.8	30	0.79	32.6	7794	1.2	240.3
71	2	205	1	0	0	0	0	0	0	1.94	1.17	1.161	56.4	101	919	377	32	3.13	167	1.51	1.29	1	87	1	39.4	21245	1.723	311.8
86	1	122	1	0	1	0	1	1	0	2.21	1.24	1.269	367	126	891	385	39	4.41	95	1.2	2.77	5.7	39	1.3	28.5	6310	2.41	334.5
63	2	77	1	0	0	1	1	0	1	1.9	0.97	1.285	425	108	654	347	41	2.17	123	0.38	1.06	1.8	68	1.46	35.1	1633	0.944	217.5
51	2	86	1	1	0	0	1	0	1	2.27	1.2	1.286	164	97	1201	426	38	3.22	61	0.86	1.77	3.6	135	3.3	49.2	3877	4.362	600.3
55	2	87	1	0	0	0	1	0	0	2.38	1.09	1.29	452	123	1202	479	37	3.68	70	0.92	2.48	3.8	94	1.11	22	8823	1.843	360.8
77	2	48	1	0	0	0	1	1	1	2.18	1.07	1.291	295	128	823	482	40	4.21	78	1.34	2.26	0.4	64	1.95	54.4	2035	1.666	204.7
63	1	88	1	0	0	0	1	0	0	2	1.29	1.291	240	96	868	606	37	4.62	104	1.11	2.84	3	197	13.7	370	6400	2.233	412.5
48	2	88	1	0	0	0	0	0	1	2.12	1.13	1.314	1276	112	1226	440	37	3.8	115	1.69	1.76	1	190	4.35	50.6	35000	3.263	436
40	1	104	1	0	0	0	0	0	0	2.67	1.01	1.33	796	124	970	404	37	3.48	76	1.43	1.46	0.3	54	1.02	13.1	5698	2.78	286.4
60	2	27	1	1	0	0	0	0	0	2.32	1.22	1.351	502	122	1624	614	40	3.13	125	0.6	1.57	1.4	82	1.56	51.6	704	2.704	329.8
95	1	64	1	0	0	1	0	0	1	1.93	1.09	1.371	119	113	455	287	35	3.63	126	0.88	2.2	3.4	13	0.89	51.7	14511	1.205	345.3
61	2	118	0	0	1	0	0	0	0	2.39	1.41	1.376	156	105	1373	599	37	3.26	103	0.84	2.01	2.8	67	1.81	33.1	1927	3.713	308.5
75	2	143	1	1	0	0	0	0	0	2.11	1.24	1.415	301	109	1133	531	36	2.54	59	1	1.25	0.7	53	1.59	44.1	7888	2.042	271.8
72	2	20	1	0	0	1	0	0	1	2.02	1.39	1.415	283	132	625	442	38	3.24	66	0.7	1.34	5.1	123	2.2	48.1	1368	0.811	260.2
65	2	86	1	1	1	0	1	0	1	2.07	1.38	1.432	147	118	619	503	36	4.33	98	0.7	2.61	15.9	24	0.99	44.8	3517	1.003	244.6
38	2	99	1	0	0	0	0	0	0	2.74	1.12	1.493	169	142	1530	756	43	5.09	75	0.72	2.8	6.5	114	1.6	16.7	546	1.934	308
56	2	134	1	0	0	0	1	0	1	2.15	1.26	1.513	126	110	1082	542	33	3.78	141	0.7	2.08	2.8	106	2.78	85.5	5531	1.205	272.8
79	1	239	1	0	0	0	0	1	0	1.87	1.38	1.546	279	124	522	328	35	4.33	155	1.56	2.08	9.1	31	1.78	48	34009	2.158	459.8
52	2	59	1	0	0	0	0	1	0	2.48	1.11	1.57	55.5	125	1140	452	40	5.97	93	1.31	3.97	1.8	171	2.23	78.4	878	4.853	287.4
71	2	95	1	0	1	0	0	0	1	1.86	1.15	1.81	135	119	910	471	37	3.84	89	0.73	2.36	6.9	132	2.71	70.7	1538	0.955	168.2
56	1	159	1	0	0	0	1	0	0	2.02	1.37	1.832	212	115	1125	527	35	4.29	118	1	2.43	0.9	65	1.68	33.2	9835	5.797	376.8
75	1	248	1	0	0	0	0	0	0	2.25	0.99	1.959	273	109	817	472	32	3.22	61	1.23	1.69	8.2	53	2.32	40.6	4161	2.713	273.3
70	1	251	1	1	0	0	1	0	0	2	1.21	2.04	312	130	823	494	39	3.5	65	1.4	1.69	0.2	53	2.17	84.6	6053	2.424	270.1
63	2	99	1	0	0	0	1	0	1	2.38	1.1	2.093	328	134	982	489	40	4.81	91	0.86	2.86	1.5	41	2.71	57.5	3440	2.286	365.6
72	1	26	1	1	0	1	1	0	1	1.97	1.33	2.138	83	103	599	420	42	3.28	100	0.89	1.89	15.7	131	2.6	63.9	6453	1.371	397.7
63	1	72	1	0	1	0	0	1	0	2.14	1.13	2.165	338	92	975	483	38	4.21	119	1.23	2.42	2.5	73	2.56	57.3	13899	2.677	230.9
88	1	35	1	1	0	0	0	0	0	1.8	1.46	2.188	215	102	396	276	34	2.43	104	1.14	1	15.9	30	2.48	137	35000	1.2	190.1
63	2	234	1	1	0	0	1	0	0	2.07	0.98	2.302	625	125	903	417	37	3.25	47	1.46	1.54	1.5	54	1.5	43.7	23741	1.71	250.3
75	2	27	1	0	0	0	1	0	0	2.23	1.59	2.303	141	105	1409	623	38	2.48	77	0.83	1.34	0.2	63	2.17	89	2203	1.522	280
70	2	211	1	0	0	0	0	0	0	2.05	1.3	2.498	186	123	1183	527	43	4.89	78	1.04	3.12	1.2	258	3.37	49.4	4546	2.686	275.6
81	1	21	1	1	0	0	0	0	0	2.12	1.33	2.502	189	105	684	488	36	4.72	135	0.75	3.19	10	15	1.2	59.6	25390	1.08	185.1
56	2	151	1	0	0	0	1	0	0	2.6	1	2.504	447	82	873	566	30	2.66	275	0.45	1.6	17.2	24	0.48	31.7	31888	4.031	337.5
52	2	252	1	0	0	1	1	0	0	2.06	1.14	2.611	499	120	1032	640	37	4.39	61	1.15	2.82	8.2	140	1.5	50.8	35000	1.629	334.8
51	2	286	1	0	0	0	1	1	0	2.17	0.97	2.764	686	120	1318	507	38	3.39	98	0.79	2.06	13.3	87	1.11	22.3	6567	3.147	394.3
80	1	106	1	1	0	0	0	0	1	2.32	1.31	2.783	175	119	784	494	38	4.17	120	0.71	2.72	3.6	34	1.12	30.7	2611	1.659	268.6
80	2	236	1	0	0	0	0	0	0	1.83	1.22	2.813	301	115	721	467	39	5.79	50	0.98	4.03	1.6	91	2.67	42.9	6926	1.131	436.6
65	1	26	1	0	0	0	1	0	1	2.07	1.42	2.846	58.8	106	516	387	35	2.42	51	0.92	1.1	10.7	52	0.96	24.5	2960	1.088	166.6
64	1	79	1	1	1	0	1	1	1	2.11	1.33	2.857	15.5	127	452	271	36	2.68	81	1.01	1.07	1.7	22	1.71	131	7528	1.559	232
52	2	86	1	1	0	0	0	1	1	2.29	1.36	2.916	38.1	109	749	524	39	2.58	54	0.83	1.49	4	293	16.6	501	35000	2.759	233.9
85	1	157	1	1	0	0	0	0	0	1.97	1.16	2.936	241	129	713	351	39	4.43	151	1.43	2.36	2.2	34	1.21	67	8876	3.538	283.2
65	1	5	1	0	0	0	0	0	0	2.03	1.24	2.994	131	110	707	354	38	3.11	102	1.53	1.03	0.3	73	1.64	33.3	5948	2.615	167.6
50	2	92	1	1	0	0	1	1	1	1.99	1.09	3.036	71.4	118	900	312	40	2.7	71	0.89	1.35	0.6	99	1.67	45.7	13340	4.072	428.5
82	1	48	1	0	0	1	0	0	1	1.9	1.21	3.147	24.5	105	883	346	36	3.88	95	0.79	2.28	5	56	1.54	29.2	4313	0.837	306.6
68	2	71	1	0	0	0	1	0	0	2.2	1.13	3.249	100	134	991	420	36	2.26	72	0.95	1.03	4.8	99	2.83	31.3	7062	0.787	223.6
76	1	213	1	1	0	0	1	0	1	1.81	1.14	3.674	93.2	110	549	464	35	3.75	111	1.1	2.11	7.9	51	1.57	46.4	8343	1.625	323
40	1	5	1	0	0	0	1	0	1	2.07	1.08	3.726	237	93	627	367	39	6.65	153	1.4	4.27	0.4	253	2.6	74.2	1650	2.269	454.9
67	2	315	1	1	0	0	1	0	0	2.14	0.96	3.786	298	115	1386	529	44	2.69	103	0.74	1.52	1.8	163	2.76	51	3398	2.635	131.6
45	2	35	1	1	0	0	1	1	0	2.16	1.45	3.792	402	100	921	461	39	3.4	65	1.66	1.27	0.9	112	1.43	40.4	35000	2.351	357.2
74	1	136	1	0	0	1	0	0	0	2.06	1.11	4.029	191	89	859	567	34	3.07	108	0.88	1.51	2.5	34	1.39	101	6603	2.677	230.9
71	2	44	1	0	0	0	1	1	1	2.17	1.38	4.24	122	120	966	447	36	4.18	72	0.66	2.32	13.7	137	2.34	67.9	1622	1.968	209.2
71	1	88	1	0	0	1	1	1	0	1.99	1.18	4.474	59.6	115	963	433	35	3.32	84	1.32	1.6	4.5	331	4.92	43.2	13432	2.391	355.3
71	1	117	1	0	1	0	1	0	1	2.01	1.51	4.58	101	109	856	381	39	4.25	106	1.54	2.03	4.8	45	1.41	45.6	16381	1.835	347.2
85	2	26	1	0	0	1	1	0	0	2.03	1.34	4.795	133	111	510	454	31	2.38	90	1.23	0.82	35.2	29	1.89	36	35000	1.3	218.1
42	2	200	1	0	0	0	1	1	0	2.49	1.32	5.802	555	140	1591	738	39	3.13	130	0.59	1.44	0.4	101	1.26	28.1	943	3.944	332.3
78	2	112	1	0	0	0	0	0	1	2.19	1.19	6.537	161	129	806	403	36	3.33	125	1.11	1.49	3.8	78	2.29	95	14914	2.502	280.3
75	1	46	1	0	0	0	0	0	0	2	1.15	7.235	335	118	950	485	38	3.77	98	0.95	2.29	2.4	54	1.68	48.4	8634	2.908	351
76	1	79	0	0	0	0	0	0	0	1.16	0.57	0.023	141	65	490	324	32	1.86	124	0.47	1.01	13.6	61	2.76	65.9	4036	2.079	508.8
70	1	12	1	0	0	0	1	1	1	1.74	0.69	0.048	66.9	94	492	418	28	3.07	97	1.19	1.13	11.8	54	2.59	61.1	3357	2.497	527.4
74	1	26	1	0	0	0	0	0	1	1.96	1.33	0.09	27.8	120	484	281	38	3.05	100	1.34	1.2	1.2	48	1.39	30.3	6507	1.598	432.5
40	2	4	1	0	0	0	1	1	1	2.38	1	0.309	89.5	106	532	416	33	3.54	77	0.6	2.11	8.3	64	2.43	74.7	1453	1.738	512.1
61	2	108	1	0	0	0	1	1	0	1.36	0.78	0.32	232	102	895	483	34	2.69	55	1.12	1.15	0.8	40	1.32	44.9	10248	2.217	298.3
75	2	4	1	1	0	0	0	0	0	2.05	0.8	0.363	37	98	264	390	28	4.33	287	1.1	2.5	1	93	1.29	6.82	345	1.195	390
65	1	11	1	0	0	1	1	0	1	2.04	0.86	0.395	173	112	512	378	36	3.17	79	1	1.59	1.6	127	1.49	48	1292	1.103	431.3
68	2	55	1	1	0	0	0	0	1	1.44	0.97	0.403	153	106	697	418	34	2.44	72	1.15	0.87	0.6	89	2.82	86.6	8962	1.828	424.7
30	2	6	1	0	0	0	1	1	1	1.86	1.05	0.5	165	80	1543	623	37	3.43	52	0.6	2.06	6.3	178	2.25	66.4	11866	1.044	334.1
64	2	78	1	1	0	0	0	1	1	1.62	1.14	0.63	429	118	1049	469	38	2.68	85	0.92	1.27	7.8	93	2.44	38.5	3947	2.742	328.9
68	2	10	1	1	0	0	1	0	1	2.45	1.42	0.677	230	129	630	476	37	5.1	74	1.13	3.29	1.1	41	1.68	41.6	2968	1.31	199
53	2	113	1	0	0	0	1	1	0	1.37	0.67	0.69	306	89	1201	494	36	3.23	76	0.97	1.81	3.2	123	2.64	224	10759	4.758	514.1
62	2	24	1	0	0	0	1	0	0	1.86	0.7	0.693	281	102	1027	387	36	1.68	70	0.82	0.63	0.8	102	0.74	19.4	2045	3.309	418.3
68	1	6	1	0	0	0	1	0	0	2.07	0.92	0.768	162	102	609	155	38	3.69	99	1.07	1.75	0.7	72	1.14	23.6	254	3.855	300
50	2	19	1	0	0	0	0	1	0	2.02	0.88	0.781	141	116	806	326	38	2.52	86	0.8	1.29	0.9	142	2.57	129	1548	2.078	418.5
71	2	26	1	1	1	0	0	1	1	1.6	1.07	0.902	103	94	473	312	36	2.29	116	0.79	1.08	2.1	66	1.33	51.2	6921	1.032	215.2
69	2	11	1	0	0	0	0	1	0	1.44	0.57	0.927	488	101	774	420	36	2.82	54	1.52	0.96	0.7	181	3.7	76.6	2388	5.118	393.3
71	2	57	1	1	0	0	0	0	1	2.24	0.83	0.927	184	124	615	328	38	2.8	91	0.78	1.35	6.7	119	2.13	42	5523	2.789	244.7
51	2	59	1	0	0	1	1	0	0	2.31	0.91	1.002	445	107	1376	424	39	3.19	125	0.69	1.5	1.6	66	0.9	21.2	405	2.11	380.3
65	2	16	1	0	0	0	0	0	1	1.52	1.08	1.021	17	68	599	367	26	1.84	68	1.09	0.38	4	42	1.45	50.1	35000	1.421	330.4
81	1	25	1	0	1	0	0	0	1	1.75	0.98	1.064	262	115	678	410	33	1.9	108	0.79	0.79	3.5	49	1.44	51	2821	1.121	312.6
84	2	12	1	0	1	0	1	1	1	1.7	0.81	1.077	131	133	716	501	35	3.76	80	0.65	1.99	1.8	55	1.7	53.4	685	0.432	339.3
42	2	10	1	0	0	0	1	0	0	1.7	0.71	1.082	94.8	90	875	312	40	2.26	59	1.06	0.81	0.3	106	0.91	38.3	388	0.82	360.1
54	2	219	1	0	0	0	0	1	0	1.72	0.48	1.119	466	105	1064	530	38	2.5	344	0.47	1.51	12.4	110	2.82	19.8	830	6	389.3
65	1	57	1	1	0	0	1	1	0	1.62	0.5	1.175	257	100	686	384	28	2.88	135	0.85	1.06	0.8	57	1.02	26.2	35000	4.703	553.7
57	1	45	1	1	1	0	0	1	1	1.68	0.72	1.388	225	114	839	448	32	2.68	161	0.73	1.4	0.3	105	2.54	63.8	8333	3.115	496.7
57	2	156	1	0	0	0	1	0	1	1.73	1	1.543	111	116	1136	536	34	3.36	95	0.57	1.51	11.4	139	3.1	119	1353	1.356	400.2
90	1	46	1	1	0	0	0	0	0	1.54	0.53	1.55	171	115	625	358	32	2.72	109	1.12	1.17	9.1	48	1.45	74.1	11182	2.711	393.7
70	2	76	1	1	0	0	0	1	1	1.83	0.86	1.717	361	110	879	582	36	1.88	98	0.56	0.99	5.5	122	2.39	56.9	1801	3.802	480.6
82	2	38	1	1	0	0	1	0	1	1.6	0.8	1.813	35.6	103	371	298	28	0.97	66	0.33	0.48	26.4	46	2.14	74.8	3190	0.828	418.9
56	1	222	1	0	0	0	0	0	0	1.52	0.52	1.946	227	117	785	570	35	2.88	105	0.43	1.52	2.2	373	16.4	64.8	5589	5.389	407.5
40	2	164	1	0	0	0	1	0	0	1.61	0.68	2.072	29.3	87	1370	251	41	5.31	65	0.61	1.79	7.6	74	1.03	19.5	1120	1.391	393.1
67	2	86	1	1	0	0	1	0	1	1.61	0.74	2.777	101	114	1057	463	38	2.58	75	0.92	1.33	10.4	65	1.65	44.1	13773	2.53	391.6
52	1	24	1	0	0	1	0	0	1	1.56	1.02	3.216	30	115	857	355	40	3.16	119	0.76	1.71	5.2	56	1.94	24.8	2815	1.455	187.3
70	2	105	1	1	1	0	1	1	1	1.72	0.87	3.667	171	126	572	276	37	2.02	74	1.06	0.7	2.1	31	1.25	39.1	35000	1.664	519.8
68	1	221	1	0	1	0	1	1	0	1.51	0.68	4.175	128	106	759	487	36	2.92	83	0.55	1.24	9.1	218	5.33	99.3	2886	0.833	240
65	2	91	1	1	1	0	1	1	1	2.8	1.15	0.016	330	107	1003	454	38	1.16	119	0.85	0.16	2.2	53	1.99	170	35000	3.948	267.2
82	1	15	1	1	0	0	1	0	1	1.88	1.39	0.197	101	123	424	400	32	3.36	57	2	0.86	0.5	30	0.93	37.5	7266	1.463	309.5
64	1	218	1	0	0	0	0	1	0	2.76	1.43	0.421	368	93	769	551	41	4.77	109	1.8	2.23	2.9	48	0.89	42.5	3359	5.739	485.2
82	2	71	1	1	0	0	0	0	0	1.97	1.11	0.471	126	117	934	421	36	3.85	89	1.04	2.41	4.4	67	2.13	41.5	35000	1.19	166.5
73	1	135	1	1	0	1	1	1	1	2.47	1.45	0.484	776	112	812	357	35	2.58	110	0.99	1.01	10	44	0.9	25.6	7440	2.009	297
77	1	135	1	1	0	0	0	0	1	1.84	1.42	0.611	618	103	824	530	33	4.59	58	1.49	2.43	0.6	27	2.23	92.6	35000	2.799	482.1
56	1	127	1	0	0	0	1	0	0	2.52	1.1	0.683	109	107	937	434	39	5.11	106	1.42	2.97	0.4	111	1.38	23	12469	3.732	417.3
34	2	24	1	0	0	0	1	0	1	2.46	1.11	0.731	321	123	1556	669	41	4.38	96	0.75	2.8	2	128	1.46	32.2	430	0.372	88.51
87	1	76	1	0	0	0	0	0	0	1.71	1.27	1.233	48.6	118	921	390	38	3.51	88	1.6	1.55	0.7	104	4.8	101	30228	2.812	402.3
76	2	18	1	1	0	1	0	0	0	1.73	1.27	1.566	220	102	757	346	35	4.03	86	1.36	2.09	1.5	92	6.71	217	35000	2.875	242.4
74	2	223	1	1	0	0	0	1	0	1.77	1.08	1.827	202	116	864	399	37	3.1	115	1.01	1.79	7.2	73	1.47	83	35000	2.631	339
83	1	95	1	0	0	1	1	0	1	1.57	1.16	1.96	283	94	659	464	36	3.89	85	0.72	2.53	5.1	80	2.67	159	9915	1.485	350.4
63	2	335	1	1	1	0	0	0	0	1.58	1.08	2.22	114	114	789	393	37	3.33	161	0.96	1.87	4.7	49	1.84	58	35000	2.849	272.6
61	1	187	1	0	0	0	1	1	1	1.63	1	2.298	225	139	680	458	41	3.7	108	1.44	1.64	0.3	45	4.08	107	10389	2.382	270.1
75	1	98	1	1	0	0	0	1	1	1.79	1.02	2.454	378	95	429	328	36	2.19	180	0.74	1.2	0.5	156	2.84	84.6	7534	3.483	524.9
63	2	64	0	0	0	1	0	0	0	1	1.15	2.613	154	118	1088	428	39	3.44	65	1.04	1.88	1	47	0.66	36.8	4961	3.47	369.6
65	2	50	1	0	1	0	1	1	0	2.16	0.87	2.782	137	122	1180	375	38	4.45	121	0.71	1.96	2.5	269	3.72	43.1	1348	1.095	150.3
72	1	227	1	0	0	1	0	0	0	1.71	1.19	2.984	148	114	990	520	35	5.29	91	1.28	3.42	3	44	1.32	36.8	7753	1.863	341.6
80	2	56	1	1	0	1	1	1	0	1.83	0.84	3.077	154	120	812	400	34	2.92	140	1.14	1.4	1	31	1.44	43.1	9667	2.424	395.6
70	1	49	0	0	0	1	0	0	0	1.66	0.93	3.198	228	116	934	360	40	3.84	72	1.39	1.89	0.3	163	4.42	73.3	7590	1.396	231.2
72	2	177	1	1	1	0	1	1	1	1.58	0.79	3.307	294	113	776	341	35	2.73	76	0.95	1.5	6.5	47	1.61	36.4	11896	5.229	419.4
68	2	47	1	1	1	0	1	1	1	1.6	1.16	3.406	185	140	777	387	38	2.54	153	1.29	0.94	6.3	58	3.26	57	35000	2.296	361.3
69	2	52	1	1	1	0	1	1	1	1.38	1.36	4.115	98.2	88	487	365	30	2.58	76	1.05	1.14	36.1	39	3.05	136	35000	1.611	360.2
79	1	242	1	1	0	1	1	0	0	1.71	0.99	6.018	74.9	104	881	499	34	2.64	55	0.49	1.39	12.7	71	1.76	64.9	23916	1.746	286.2
